# Supplementary material
Source: PubMed Central journal article supplement (PMC10161736)
Supplement: NIHMS1876287-supplement-supinfo.pdf [file NIHMS1876287-supplement-supinfo.pdf]

## Supplemental Information

### Polyacrylamide-based Hydrogel Coating Improves Biocompatibility of Implanted Devices

Doreen Chan, Caitlin L. Maikawa, Andrea d'Aquino, Shyam S. Raghavan, Megan L. Troxell, Eric A. Appel\*

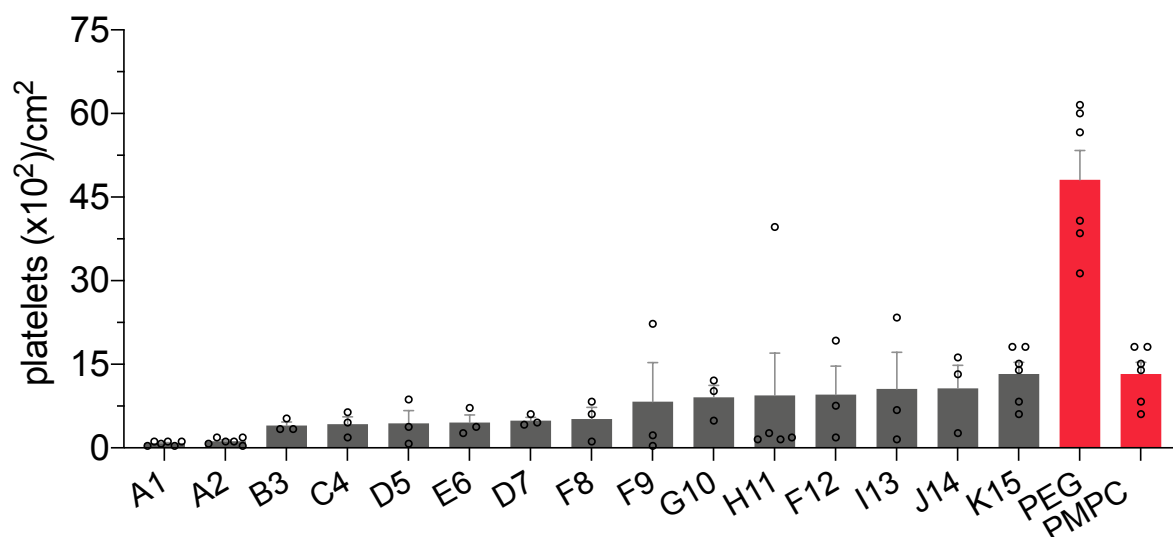

**Fig. S1.** Platelet adhesion counts for top 15 anti-biofouling combinatory polyacrylamide hydrogels and PEG and PMPC hydrogel formulations. Mean  $\pm$  standard error of platelets on hydrogels are shown with  $n \geq 3$ .

**Fig. S2.** Table of formulations from selected mix of anti-blood biofouling hydrogels

| Ranking on Platelet Adhesion | Monomer 1 | Monomer 2 |
|------------------------------|-----------|-----------|
| 20                           | 15% Am    | 5% HMAm   |
| 22                           | 15% HMAm  | 5% MPAm   |
| 27                           | 20% Am    | -         |
| 30                           | 15% Am    | 5% DMAm   |
| 46                           | 15% NiPAm | 5% Am     |
| 49                           | 5% ALMP   | 15% tHMAm |
| 57                           | 15% Am    | 5% HEAm   |
| 108                          | 10% DEAm  | 10% tHMAm |
| 151                          | 10% ALMP  | 10% HMAm  |
| 153                          | 10% ALMP  | 10% DEAm  |

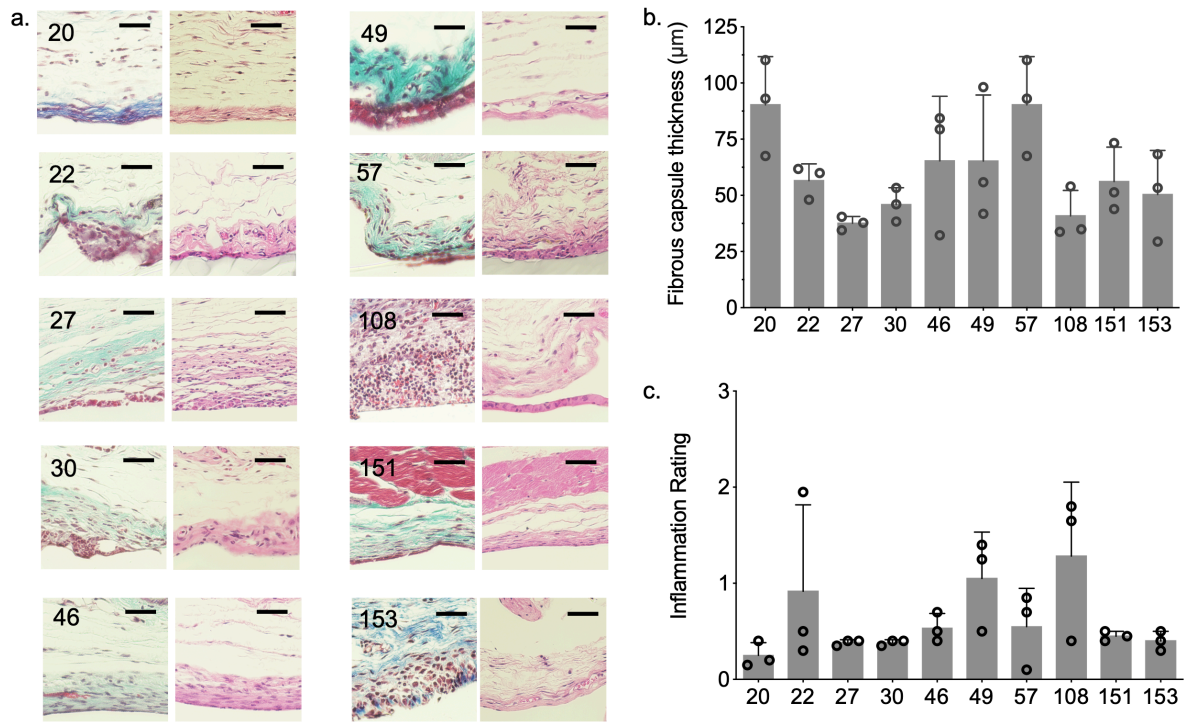

**Fig. S3. a.** Histology images for selected subset of hydrogel library. Number indicates ranking on platelet adhesion test. Scale bar represents 50  $\mu\text{m}$ . **b.** Fibrous capsule thickness of  $n = 3$  samples (mean  $\pm$  s.d.) where each mean was determined from the median of 10 fibrous capsule thicknesses per image. **c.** Inflammation ratings from blinded pathologists to characterize extent of inflammation.

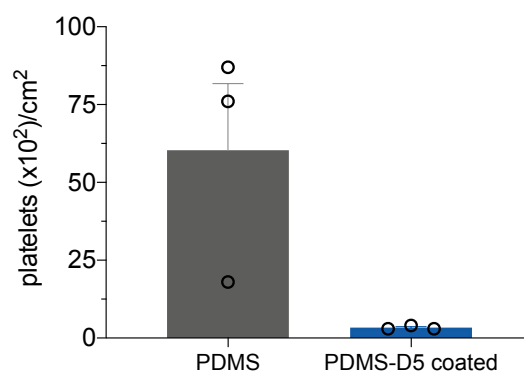

**Fig. S4.** Platelet counts for PDMS and D5-hydrogel coated PDMS. Data shows mean  $\pm$  standard error of number of platelets on surfaces. Data analyzed with an unpaired t test,  $p = 0.056$ ,  $n = 3$ .

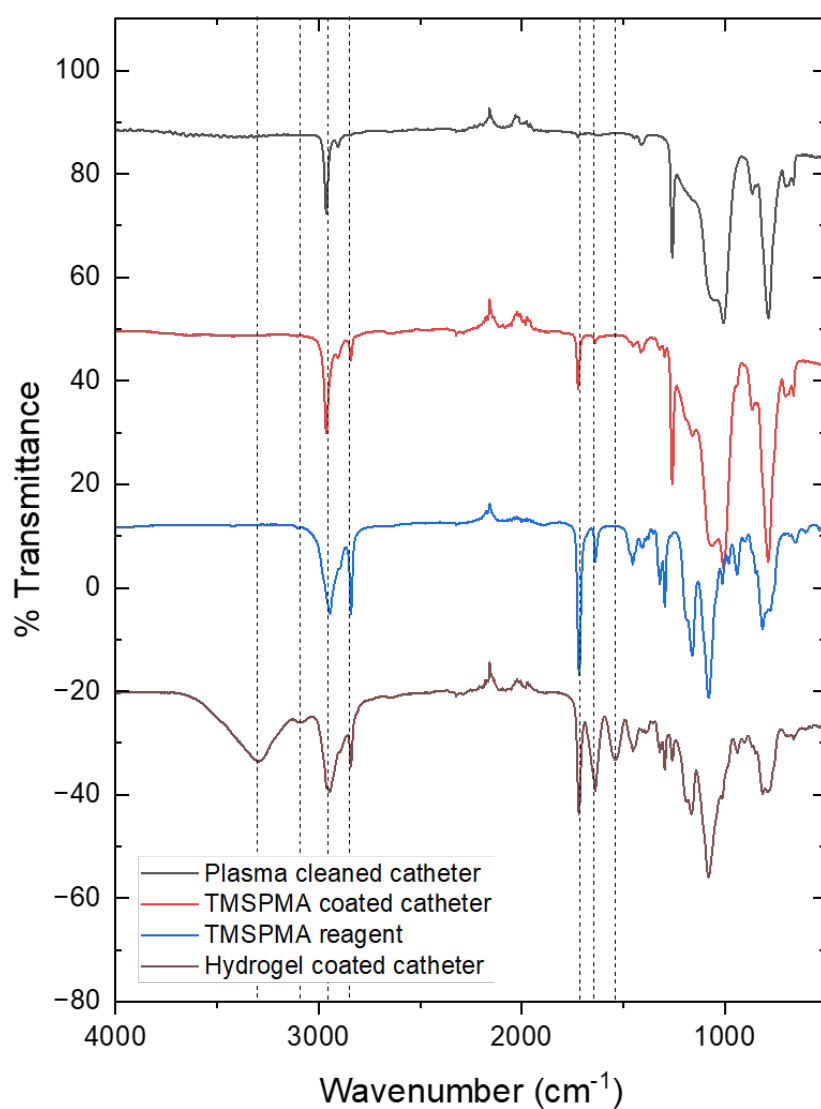

**Fig. S5.** FTIR characterization of coated catheters, including (i) plasma cleaned catheter surfaces, (ii) TMSPMA-coated catheter surfaces, (iii) TMSPMA reagent, and (iv) hydrogel-coated catheter surfaces.

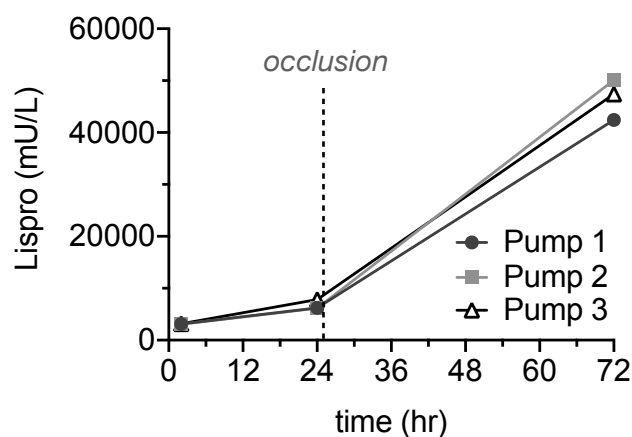

**Fig. S6.** Insulin lispro concentration into PBS from osmotic pumps at 37°C. Aliquots were taken at specified timepoints to determine insulin concentration. Occlusion was induced on the pumps at 24 hr, resulting in a corresponding sharp increase in detected insulin.

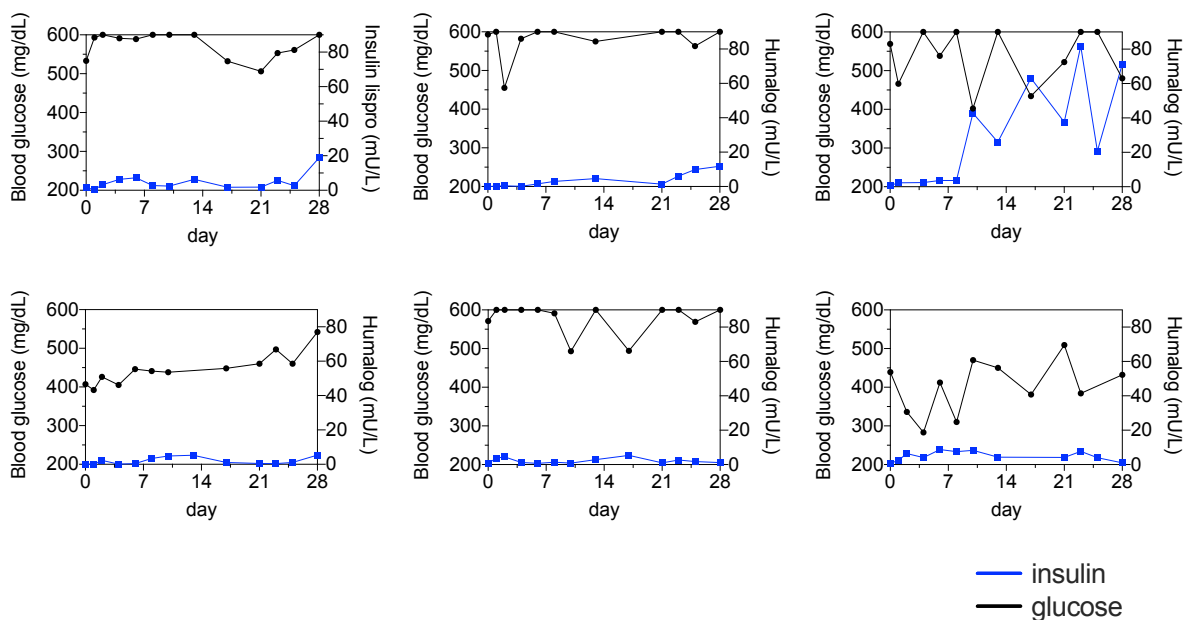

**Fig. S7.** Blood glucose values and humalog concentration from blood serum. Maximum detection limit for blood glucose levels were 600 mg/dL.

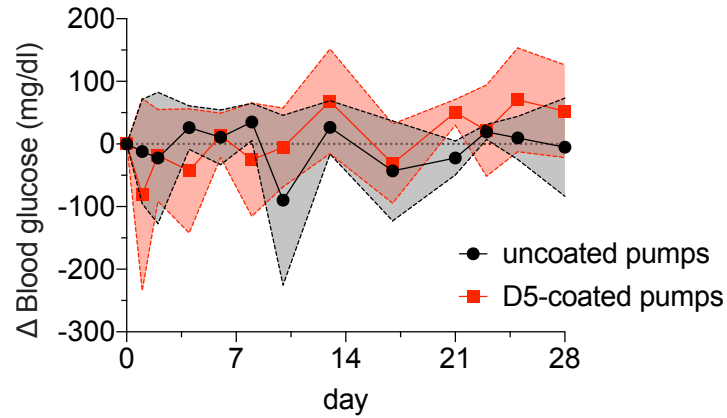

**Fig. S8.** Change in blood glucose levels of rats with uncoated and D5-coated pumps. Data represents mean  $\pm$  standard deviation,  $n = 3$ .

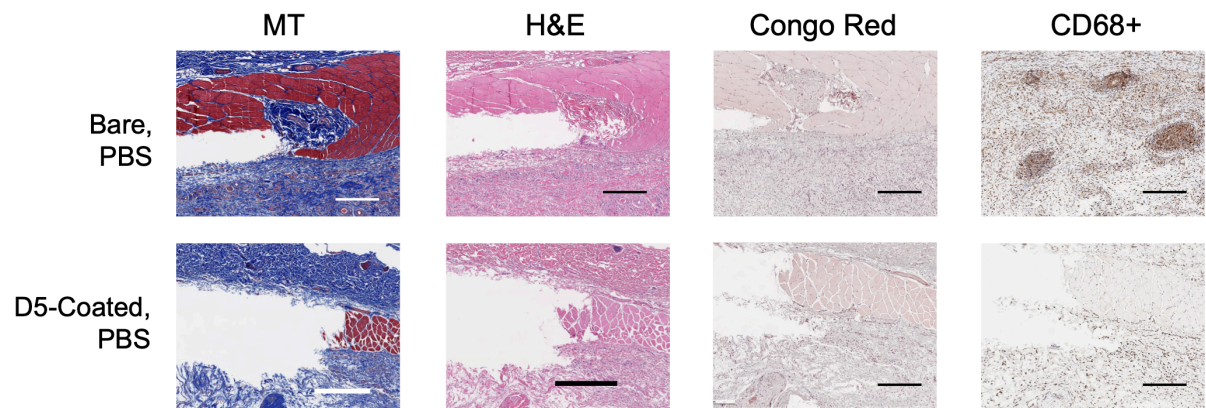

**Fig. S9.** Histology images of tissues surrounding catheter tips (bare and D5-coated) of osmotic pumps infusing PBS. Masson's trichrome (MT), hematoxylin & eosin (H&E), congo red, and CD68+ staining were performed on histology samples, and representative images are shown. Scale bar represents 50  $\mu\text{m}$ .
